# Supplementary material for: Foraging efficiency, social status and body condition in group-living horses and ponies
Source: PeerJ. 2020 Nov 9;8:e10305. doi: 10.7717/peerj.10305 (PMC7659649; doi:10.7717/peerj.10305)
Supplement: Supplemental Information 3 [file peerj-08-10305-s003.xlsx]

## Sheet: Authors
The relationship between foraging efficiency, social status and body condition in group-living horses and ponies
S.L.Giles1, P.A.Harris2, S.A.Rands3 and C.J. Nicol4*
1. University of Bristol, School of Veterinary Science, Langford, Bristol BS40 5DU, UK.
2. Equine Studies Group, WALTHAM Petcare Science Institute, Freeby Lane, Waltham-on-the-Wolds, Melton Mowbray, Leicestershire LE14 4RT, UK.
3. University of Bristol, School of Biological Sciences, Life Sciences Building, Tyndall Avenue, Bristol BS8 1TQ, UK.
4. Royal Veterinary College, Hawkshead Lane, Brookmans Park, Hatfield, AL9 7TA
* Corresponding author. Email cnicol@rvc.ac.uk

## Sheet: Observational data
			Outcome	Baseline Information										Dominance															Foraging Time			Interruption Time
Herd Number	Individual Number	Name	BCS	Height	DOB/Age years		Age (months)	Breed	Breed Category	Months Herd been together	Sex	Sex Category	Receive supplementary feed?	Number of horses dominant towards field	Number of horses dominated by field	Total Number of dominance towards field	Total number of dominance received field	Total number of interactions field	Dominance Rank Field	Herd Size	Adjusted Dominance Rank Field	Number of horses dominant towards bucket	Number of horses dominated by bucket	Total number dominance towards bucket	Total number dominance received bucket	Total number of interactions bucket	Dominance Rank Bucket	Adjusted Dominance Rank Bucket	Percentage of time foraging am	Percentage of time foraging pm	Overall percentage of time foraging	Total time interrupted am	Denominator time observed am	Percentage of foraging time interrupted am	Total time interrupted pm	Denominator time observed pm	Percentage of foraging time interrupted pm	Total time interrupted overall	Denominator time observed overall	Percentage of foraging interrupted overall	Average interruption time am	Average interruption time pm	Average interruption time overall	Median Interruption Time	Mode interruption time
1	1	Seatbelt	8	13	7	7	84	Native x	1	6	Mare	1	0	0	2	0	18	18	3	3	0	0	2	0	5	5	3	0	0.972222	0.75	0.861111	0.84	34	2.47059	2.88	38	7.57895	3.72	72	5.16667	0.0763636	0.0993103	0.093	0.075	0.1
1	2	Moirah	6.5	13	11	11	132	Native x	1	6	Mare	1	0	2	0	18	0	18	1	3	0.666667	2	0	5	0	5	1	0.666667	0.944444	0.694444	0.819444	0.7	35	2	3.31	28	11.8214	4.01	63	6.36508	0.0583333	0.127308	0.105526	0.07	0.105526
1	3	Graceland	5.5	12.2	12	12	144	Native x	1	6	Mare	1	0	1	1	8	8	16	2	3	0.333333	1	1	4	4	8	2	0.333333	0.833333	0.638889	0.736111	0.84	34	2.47059	1.1	35	3.14286	1.94	69	2.81159	0.0763636	0.055	0.0625806	0.05	0.0625806
2	4	Rascal	6	14	6	6	72	Welsh Cob	4	36	Gelding	2	1	1	0	10	0	10	1	2	0.5	0	0	0	0	0	1	0.5	0.583333	0.555556	0.569444	2.74	30	9.13333	2.18	36	6.05556	4.92	66	7.45455	0.0830303	0.0838462	0.0833898	0.07	0.0833898
2	5	Norman	5	14	4	4	48	Welsh Cob	4	36	Gelding	2	1	0	1	0	10	10	2	2	0	0	0	0	0	0	1	0.5	0.777778	0.638889	0.708333	5.83	48	12.1458	2.38	43	5.53488	8.21	91	9.02198	0.0988136	0.0610256	0.0837755	0.07	0.0837755
3	6	Pansy	5	10	1	1	12	Welsh Cross	1	6	Gelding	2	.	0	3	2	17	19	4	4	0	0	3	0	6	6	4	0	0.861111	0.805556	0.833333	0.73	22	3.31818	1.16	28	4.14286	1.89	50	3.78	0.0608333	0.0552381	0.0572727	0.04	0.0572727
3	7	Bert	7	11	3.5	3.5	42	Welsh Cross	1	6	Filly	4	.	2	1	8	2	10	1	4	0.75	3	0	8	0	8	1	0.75	0.916667	1	0.958333	1.45	30	4.83333	1.3	26	5	2.75	56	4.91071	0.0517857	0.0764706	0.0611111	0.04	0.0611111
3	8	Violet	6	10	5	5	60	Welsh Cross	1	6	Mare	1	.	2	1	11	4	15	1	4	0.75	1	1	2	1	3	2	0.5	0.944444	0.944444	0.944444	1.29	30	4.3	2.29	30	7.63333	3.58	60	5.96667	0.0460714	0.0880769	0.0662963	0.05	0.0662963
3	9	Mr Banks	6	11	2.5	2.5	30	Welsh Cross	1	6	Gelding	2	.	2	1	11	9	20	1	4	0.75	1	2	1	4	5	3	0.25	1	0.944444	0.972222	0.64	29	2.2069	1	30	3.33333	1.64	59	2.77966	0.0376471	0.0625	0.049697	0.03	0.049697
4	10	Merlin	5	14	2000-05-07	20	240	Welsh Cob	4	36	Gelding	2	.	0	2	0	15	15	3	3	0	0	1	0	2	2	3	0	0.611111	0.555556	0.583333	0.96	16	6	3.48	26	13.3846	4.44	42	10.5714	0.0872727	0.12	0.111	0.08	0.111
4	11	Terminator	5.5	14.1	2000-03-20	20	240	Welsh Cob	4	36	Gelding	2	.	1	1	10	4	14	2	3	0.333333	1	1	2	3	5	2	0.333333	0.722222	0.5	0.611111	2.11	31	6.80645	2.75	26	10.5769	4.86	57	8.52632	0.0680645	0.0743243	0.0714706	0.04	0.0714706
4	12	Sir Owain	6	13.2	2010-01-05	10	120	Welsh Cob	4	36	Stallion	3	.	2	0	10	1	11	1	3	0.666667	1	0	3	0	3	1	0.666667	0.666667	0.472222	0.569444	0.78	20	3.9	2.51	29	8.65517	3.29	49	6.71429	0.0866667	0.0678378	0.0715217	0.05	0.0715217
5	13	Vegas	5.5	13.1	2006-04-14	14	168	Welsh Cob	4	7	Gelding	2	.	4	1	10	1	11	1	6	0.833333	2	0	3	0	3	2	0.666667	0.916667	0.333333	0.625	0.64	18	3.55556	0.41	14	2.92857	1.05	32	3.28125	0.0457143	0.05125	0.0477273	0.04	0.0477273
5	14	Morris	5	13.1	2006-07-17	14	168	Welsh x	7	7	Gelding	2	.	1	4	4	12	16	5	6	0.166667	1	2	2	6	8	4	0.333333	0.972222	0.611111	0.791667	1.6	19	8.42105	0.53	20	2.65	2.13	39	5.46154	0.133333	0.0588889	0.101429	0.06	0.101429
5	15	Scribble	8	13	2007-03-23	13	156	New forest x	1	7	Gelding	2	.	4	1	14	1	15	1	6	0.833333	3	1	4	2	6	1	0.833333	0.861111	0.361111	0.611111	0.9	16	5.625	0.14	11	1.27273	1.04	27	3.85185	0.1125	0.0466667	0.0945455	0.05	0.0945455
5	16	Archie	7	11.2	2005-07-17	15	180	Welsh x	1	7	Gelding	2	.	2	3	10	13	23	4	6	0.333333	2	3	5	5	10	4	0.333333	0.944444	0.722222	0.833333	2.43	20	12.15	0.75	18	4.16667	3.18	38	8.36842	0.151875	0.09375	0.1325	0.12	0.1325
5	17	Tupelo	5.5	15	2010-04-15	10	120	Native x TB	2	7	Gelding	2	.	0	5	0	18	18	6	6	0	0	3	0	5	5	6	0	0.777778	0.888889	0.833333	0.44	19	2.31579	0.13	5	2.6	0.57	24	2.375	0.0628571	0.0433333	0.057	0.05	0.057
5	18	Norris	6.5	11.3	2005-07-17	15	180	Welsh x	1	7	Gelding	2	.	3	2	5	7	12	3	6	0.5	2	1	6	2	8	3	0.5	0.916667	0.722222	0.819444	0.79	17	4.64706	1.69	20	8.45	2.48	37	6.7027	0.079	0.0804762	0.08	0.07	0.08
6	19	Elliot	5	11	2013-08-31	0.42	5	Highland x	1	6	Colt	5	1	0	4	3	8	11	6	7	0.142857	0	3	0	4	4	7	0	0.428571	0.518519	0.472727	0.47	7	6.71429	1.53	10	15.3	2	17	11.7647	0.094	0.153	0.133333	0.11	0.133333
6	20	Amera	5	12.3	2004-07-08	16	192	Welsh x	1	6	Mare	1	0	4	1	10	1	11	2	7	0.714286	2	1	4	1	5	2	0.714286	0.694444	0.666667	0.680556	1.73	15	11.5333	2.7	19	14.2105	4.43	34	13.0294	0.108125	0.0818182	0.0904082	0.07	0.0904082
6	21	Tigger	5	11	2013-04-27	0.75	9	Welsh x	1	6	Colt	5	0	1	4	3	8	11	5	7	0.285714	0	1	0	1	1	5	0.285714	0.694444	0.444444	0.569444	1.24	13	9.53846	1.3	16	8.125	2.54	29	8.75862	0.112727	0.0928571	0.1016	0.07	0.1016
6	22	Roo	5.5	11	2013-04-27	0.75	9	Welsh x	1	6	Filly	4	0	0	3	0	10	10	6	7	0.142857	1	3	1	5	6	6	0.142857	0.472222	0.416667	0.444444	1.7	11	15.4545	1.59	15	10.6	3.29	26	12.6538	0.0894737	0.0757143	0.08225	0.065	0.08225
6	23	Flo	5.5	12.2	2009-07-08	11	132	Welsh x	1	6	Mare	1	0	3	3	10	14	24	4	7	0.428571	2	2	3	5	8	3	0.571429	0.5	0.361111	0.430556	0.5	10	5	1.65	14	11.7857	2.15	24	8.95833	0.0714286	0.0868421	0.0826923	0.05	0.0826923
6	24	Missy	5.5	13	2002-07-08	18	216	Highland x	1	6	Mare	1	1	5	0	11	0	11	1	7	0.857143	5	0	8	0	8	1	0.857143	0.25	0.62963	0.436364	0.58	13	4.46154	1.04	15	6.93333	1.62	28	5.78571	0.058	0.0945455	0.0771429	0.08	0.0771429
6	25	Winnie	5	12.2	2009-07-08	11	132	Welsh x	1	6	Mare	1	0	4	2	11	7	18	3	7	0.571429	1	1	1	1	2	3	0.571429	0.722222	0.472222	0.597222	0.9	13	6.92308	1.52	14	10.8571	2.42	27	8.96296	0.1125	0.0844444	0.0930769	0.065	0.0930769
7	26	Cavendish	5	15	1997-06-10	23	276	Other	7	4	Mare	1	0	1	2	1	4	5	7	10	0.3	0	2	0	2	2	6	0.4	0.666667	0.833333	0.75	0.39	15	2.6	0.9	14	6.42857	1.29	29	4.44828	0.078	0.15	0.117273	0.1	0.117273
7	27	Annabelle	5	14	1992-01-01	28	336	Cob X	4	4	Mare	1	1	2	2	6	5	11	4	10	0.6	2	2	2	2	4	4	0.6	0.586207	0.413793	0.5	0.96	12	8	1.25	15	8.33333	2.21	27	8.18519	0.137143	0.078125	0.096087	0.08	0.096087
7	28	Simbro	7	14.3	1995-04-06	25	300	Cob	4	4	Gelding	2	0	5	0	8	0	8	1	10	0.9	2	0	3	0	3	2	0.8	0.416667	0.583333	0.5	0.22	13	1.69231	0.49	20	2.45	0.71	33	2.15152	0.0366667	0.163333	0.0788889	0.04	0.0788889
7	29	Queenie	8	15	1988-02-28	32	384	Cob	4	4	Mare	1	0	1	1	2	1	3	4	10	0.6	.	.	.	.	.	.	.	0.527778	.	0.527778	0.41	13	3.15385	.	.	.	0.41	13	3.15385	0.082	.	0.082	0.06	0.082
7	30	Mac	5	14	1986-09-25	33	396	TBxIrish	2	4	Gelding	2	1	1	5	7	9	16	9	10	0.1	0	2	0	2	2	6	0.4	0.827586	0.896552	0.862069	0.37	16	2.3125	0.86	19	4.52632	1.23	35	3.51429	0.123333	0.122857	0.123	0.11	0.123
7	31	Trigger	4.5	14	1986-05-15	34	408	Other	7	4	Gelding	2	0	2	3	4	7	11	7	10	0.3	1	3	1	5	6	5	0.5	0.583333	0.833333	0.708333	0.4	15	2.66667	0.13	9	1.44444	0.53	24	2.20833	0.0666667	0.0433333	0.0588889	0.04	0.0588889
7	32	Red Puff	5	14.2	1990-06-22	30	360	Arab	2	4	Gelding	2	0	3	3	8	5	13	4	10	0.6	2	1	3	1	4	3	0.7	0.666667	0.722222	0.694444	0.43	10	4.3	0.54	10	5.4	0.97	20	4.85	0.0716667	0.18	0.107778	0.1	0.107778
7	33	Rocky	7	14.2	1994-05-08	26	312	Cob	4	4	Gelding	2	0	1	6	2	19	21	10	10	0	0	0	0	0	0	.	.	0.666667	0.583333	0.625	0.47	12	3.91667	1.04	18	5.77778	1.51	30	5.03333	0.05875	0.0742857	0.0686364	0.065	0.0686364
7	34	Nicole	8	16	1995-03-22	25	300	Arab x Dutch warmblood	2	4	Mare	1	0	4	1	8	2	10	3	10	0.7	4	1	5	2	7	1	0.9	0.75	0.527778	0.638889	0.6	17	3.52941	0.97	15	6.46667	1.57	32	4.90625	0.2	0.0881818	0.112143	0.09	0.112143
7	35	Billy	5	14	12	12	144	Cob	4	4	Gelding	2	1	3	0	6	0	6	2	10	0.8	0	0	0	0	0	.	.	.	0.68	0.68	.	.	.	0.33	10	3.3	0.33	10	3.3	.	0.165	0.165	0.165	0.165
8	36	Ernie	5.5	11.3	2008-07-07	12	144	Welsh	1	6	Stallion	3	0	0	4	0	8	8	8	9	0.111111	.	.	.	.	.	.	.	0.916667	.	0.916667	0.44	18	2.44444	.	.	.	0.44	18	2.44444	0.0628571	.	0.0628571	0.06	0.0628571
8	37	Bernie	5	11	2009-06-17	11	132	Welsh	1	6	Stallion	3	0	3	4	4	5	9	7	9	0.222222	.	.	.	.	.	.	.	0.861111	.	0.861111	0.98	19	5.15789	.	.	.	0.98	19	5.15789	0.0466667	.	0.0466667	0.04	0.0466667
8	38	Dastardly	6	12	2010-09-27	9	108	Welsh x	1	6	Stallion	3	0	3	2	3	3	6	4	9	0.555556	.	.	.	.	.	.	.	0.75	.	0.75	0.73	18	4.05556	.	.	.	0.73	18	4.05556	0.0521429	.	0.0521429	0.04	0.0521429
8	39	Riddler	7	11.3	2005-06-02	15	180	Welsh	1	6	Stallion	3	0	1	0	1	0	1	3	9	0.666667	.	.	.	.	.	.	.	0.972222	.	0.972222	0.68	20	3.4	.	.	.	0.68	20	3.4	0.0357895	.	0.0357895	0.03	0.0357895
8	40	Bluto	6	10.3	2009-07-02	11	132	Welsh	1	6	Stallion	3	0	0	4	0	5	5	8	9	0.111111	.	.	.	.	.	.	.	1	.	1	0.91	18	5.05556	.	.	.	0.91	18	5.05556	0.0827273	.	0.0827273	0.03	0.0827273
8	41	Muttley	7.5	11	2009-03-27	11	132	Welsh	1	6	Stallion	3	0	3	3	6	4	10	5	9	0.444444	.	.	.	.	.	.	.	0.972222	.	0.972222	0.63	18	3.5	.	.	.	0.63	18	3.5	0.105	.	0.105	0.09	0.105
8	42	Hopper	7	11.2	2006-06-07	14	168	Welsh	1	6	Stallion	3	0	4	0	4	0	4	1	9	0.888889	.	.	.	.	.	.	.	1	.	1	0.83	20	4.15	.	.	.	0.83	20	4.15	0.0691667	.	0.0691667	0.035	0.0691667
8	43	Woozel	5.5	10.3	2007-05-24	13	156	Welsh	1	6	Stallion	3	0	3	0	4	0	4	2	9	0.777778	.	.	.	.	.	.	.	0.916667	.	0.916667	0.79	18	4.38889	.	.	.	0.79	18	4.38889	0.09875	.	0.09875	0.105	0.09875
8	44	Randall	6	11.2	2004-03-27	16	192	Welsh	1	6	Stallion	3	0	1	1	3	1	4	5	9	0.444444	.	.	.	.	.	.	.	0.888889	.	0.888889	0.76	20	3.8	.	.	.	0.76	20	3.8	0.0542857	.	0.0542857	0.04	0.0542857
9	45	Misty A	5	15	2007-04-30	13	156	TBx	2	3	Mare	1	0	2	4	19	14	33	5	8	0.375	3	0	3	0	3	1	0.875	0.944444	0.888889	0.916667	0.68	20	3.4	1.01	18	5.61111	1.69	38	4.44737	0.0618182	0.0673333	0.0618182	0.04	0.0618182
9	46	Rummy	6	15.2	1995-07-12	25	300	TB	2	3	Gelding	2	0	4	1	12	10	22	2	8	0.75	0	0	0	0	0	.	.	0.916667	0.972222	0.944444	0.68	20	3.4	1.28	20	6.4	1.96	40	4.9	0.0523077	0.0853333	0.0523077	0.04	0.0523077
9	47	Susie	5.5	15	2004-10-19	15	180	TBx	2	3	Mare	1	0	4	2	16	6	22	4	8	0.5	0	0	0	0	0	.	.	0.888889	0.944444	0.916667	0.61	20	3.05	0.94	19	4.94737	1.55	39	3.97436	0.038125	0.0723077	0.0534483	0.03	0.0534483
9	48	Misty D	5	15	1997-04-29	23	276	TBx	2	3	Mare	1	0	0	5	1	20	21	8	8	0	0	0	0	0	0	.	.	0.944444	0.972222	0.958333	0.27	19	1.42105	0.53	17	3.11765	0.8	36	2.22222	0.045	0.0353333	0.0380952	0.03	0.0380952
9	49	Austin	6	15.3	2008-05-28	12	144	TBxCob	7	3	Gelding	2	0	0	3	0	6	6	6	8	0.25	.	.	.	.	.	.	.	.	0.944444	0.944444	.	.	.	1.06	17	6.23529	1.06	17	6.23529	.	0.0883333	0.0883333	0.045	0.0883333
9	50	Lilly	5.5	14.2	1998-01-01	22	264	Tbx	2	3	Mare	1	0	5	2	16	14	30	3	8	0.625	1	2	1	3	4	3	0.625	0.944444	1	0.972222	0.93	20	4.65	1.31	20	6.55	2.24	40	5.6	0.03875	0.062381	0.0497778	0.04	0.0497778
9	51	Nightingale	5	15	2010-06-28	10	120	TB	2	2	Mare	1	1	6	0	24	2	26	1	8	0.875	1	1	1	1	2	2	0.75	0.916667	0.941176	0.928571	1	18	5.55556	0.86	13	6.61538	1.86	31	6	0.0588235	0.086	0.0688889	0.06	0.0688889
9	52	Sullie	6	16	2008-01-29	12	144	TB	2	2	Gelding	2	1	0	4	1	17	18	7	8	0.125	0	2	0	2	2	4	0.5	0.944444	0.911765	0.928571	0.86	20	4.3	0.67	20	3.35	1.53	40	3.825	0.0452632	0.0744444	0.0546429	0.03	0.0546429
10	53	Finnegan	5	14.2	18	18	216	Cob	4	6	Gelding	2	1	3	1	7	3	10	2	7	0.714286	3	1	5	1	6	2	0.714286	0.756098	0.388889	0.671642	0.61	20	3.05	0.59	15	3.93333	1.2	35	3.42857	0.0677778	0.118	0.0857143	0.055	0.0857143
10	54	Blue Ice	5	12	3	3	36	Cob	4	6	Gelding	2	1	1	3	3	7	10	6	7	0.142857	0	2	0	3	3	6	0.142857	0.692308	0.611111	0.710145	0.38	16	2.375	0.32	17	1.88235	0.7	33	2.12121	0.126667	0.08	0.1	0.03	0.1
10	55	Dolly	7.5	12	18	18	216	Native pony	1	6	Mare	1		1	1	5	1	6	3	7	0.571429	1	0	1	0	1	3	0.571429	1	0.555556	0.777778	0.55	20	2.75	0.7	15	4.66667	1.25	35	3.57143	0.0785714	0.0636364	0.0694444	0.05	0.0694444
10	56	Troy	5.5	13	32	32	384	Unknown	7	6	Gelding	2		3	0	6	0	6	1	7	0.857143	2	0	2	0	2	1	0.857143	0.756098	0.305556	0.626866	0.74	20	3.7	0.35	9	3.88889	1.09	29	3.75862	0.0528571	0.0583333	0.0545	0.035	0.0545
10	57	Tilly	6	13.2	18	18	216	New Forest	1	6	Mare	1		2	2	4	7	11	3	7	0.571429	1	1	1	1	2	4	0.428571	0.972222	0.361111	0.666667	1.1	19	5.78947	0.81	20	4.05	1.91	39	4.89744	0.0846154	0.0578571	0.0707407	0.04	0.0707407
10	58	Ivy	5	10.1	1	1	12	Unknown	7	6	Filly	4		0	4	1	10	11	7	7	0	0	3	0	4	4	7	0	0.861111	0.777778	0.819444	1.04	18	5.77778	1.4	19	7.36842	2.44	37	6.59459	0.0577778	0.155556	0.0903704	0.05	0.0903704
10	59	Holly	5	13	2	2	24	Cob x native pony	7	6	Filly	4	1	2	2	4	2	6	3	7	0.571429	2	2	2	2	4	4	0.428571	0.564103	0.305556	0.478261	0.81	15	5.4	0.6	18	3.33333	1.41	33	4.27273	0.0675	0.15	0.088125	0.03	0.088125
11	60	Jigsaw	6.5	13	17	17	204	Native Cross	1	6	Gelding	2		6	0	13	2	15	1	9	0.888889	3	0	3	0	3	1	0.888889	0.861111	0.444444	0.652778	0.1	15	0.666667	0.27	10	2.7	0.37	25	1.48	0.0333333	0.0675	0.0528571	0.02	0.0528571
11	61	Polly	5.5	12.2	11	11	132	New Forest	1	6	Mare	1		1	6	2	20	22	8	9	0.111111	1	0	1	0	1	2	0.777778	0.888889	0.416667	0.652778	1.34	15	8.93333	0.49	15	3.26667	1.83	30	6.1	0.103077	0.06125	0.0871429	0.04	0.0871429
11	62	Wisteria	6	12.1	5	5	60	Welsh Cross	1	6	Mare	1		1	5	2	7	9	6	9	0.333333	0	1	0	2	2	5	0.444444	0.861111	0.305556	0.583333	0.19	15	1.26667	0.58	13	4.46154	0.77	28	2.75	0.038	0.0527273	0.048125	0.03	0.048125
11	63	Monique	7	12.2	13	13	156	Welsh Cross	1	6	Mare	1		6	2	10	6	16	2	9	0.777778	0	0	0	0	0	.	.	0.861111	0.388889	0.625	0.36	15	2.4	0.47	8	5.875	0.83	23	3.6087	0.0327273	0.156667	0.0592857	0.025	0.0592857
11	64	Mars	6	12.3	11	11	132	Welsh	1	6	Gelding	2		6	2	13	3	16	2	9	0.777778	0	1	0	1	1		1	0.888889	0.333333	0.611111	0.29	15	1.93333	0.71	13	5.46154	1	28	3.57143	0.0322222	0.0788889	0.0555556	0.02	0.0555556
11	65	Cinders	5	15	13	13	156	TBx	2	6	Mare	1		5	2	15	5	20	4	9	0.555556	2	1	3	1	4	2	0.777778	0.861111	0.277778	0.569444	0.7	15	4.66667	0.32	9	3.55556	1.02	24	4.25	0.0538462	0.08	0.06	0.05	0.06
11	66	Deano	7	12.1	5	5	60	Cob Cross	7	6	Gelding	2		0	4	0	6	6	9	9	0	1	1	1	1	2	4	0.555556	0.888889	0.222222	0.555556	0.64	15	4.26667	0.45	15	3	1.09	30	3.63333	0.064	0.225	0.0908333	0.075	0.0908333
11	67	Hickery	7	12	5	5	60	Native Cross	1	6	Gelding	2		1	5	3	11	14	6	9	0.333333	0	3	0	3	0	6	0.333333	0.861111	0.472222	0.666667	0.88	15	5.86667	0.36	15	2.4	1.24	30	4.13333	0.0586667	0.09	0.0652632	0.07	0.0652632
11	68	Bonsai	5.5	12.3	5	5	60	Native Cross	1	6	Gelding	2		2	2	5	3	8	5	9	0.444444	0	0	0	0	0	.	.	0.833333	0.277778	0.555556	0.76	15	5.06667	0.51	14	3.64286	1.27	29	4.37931	0.0633333	0.06375	0.0635	0.045	0.0635
12	69	Katy	5.5	12.3	24	24	288	Native Cross	1	6	Mare	1		1	2	1	3	4	3	4	0.25	2	1	3	2	5	1	0.75	0.846154	1	1	0.45	5	9	1.82	24	7.58333	2.27	29	7.82759	0.0642857	0.0827273	0.0782759	0.05	0.0782759
12	70	Herbie	5.5	11.2	15	15	180	Welsh Section A	1	6	Gelding	2		1	0	4	1	5	2	4	0.5	0	1	0	2	2	2	0.5	0.846154	1	1	0.31	5	6.2	1.97	25	7.88	2.28	30	7.6	0.0516667	0.0703571	0.0670588	0.045	0.0670588
12	71	Olivia	6.5	14	23	23	276	Native Cross	1	6	Mare	1		0	2	0	4	4	4	4	0	0	1	0	1	1	2	0.5	1	1	1	1.63	25	6.52	1.94	25	7.76	3.57	50	7.14	0.0679167	0.0843478	0.0759574	0.05	0.0759574
12	72	Slim Jim	5.5	13.1	11	11	132	Welsh	4	0	Gelding	2		2	0	7	1	8	1	4	0.75	1	0	2	0	2	1	0.75	1	1	1	2.18	20	10.9	2.48	23	10.7826	4.66	43	10.8372	0.10381	0.0751515	0.0862963	0.06	0.0862963
13	73	Faith	5	14	4	4	48	Cob CrossxTB	2	2	Mare	1		0	5	0	19	19	6	6	0	0	4	0	7	7	5	0.166667	0.5	0.5	0.5	0.73	16	4.5625	1.89	18	10.5	2.62	34	7.70588	0.0561538	0.0945	0.0793939	0.05	0.0793939
13	74	Malachite	8	12.2	12	12	144	Native	1	6	Gelding	2		3	1	4	2	6	2	6	0.666667	1	2	1	2	3	4	0.333333	0.611111	0.694444	0.652778	0.82	15	5.46667	0.62	12	5.16667	1.44	27	5.33333	0.0546667	0.0885714	0.0654545	0.05	0.0654545
13	75	Rumpel	8	14.1	6	6	72	Cob Cross	4	6	Gelding	2		2	1	8	3	11	3	6	0.5	2	2	2	3	5	3	0.5	0.611111	0.638889	0.625	1.05	18	5.83333	1.09	19	5.73684	2.14	37	5.78378	0.105	0.0838462	0.0930435	0.05	0.0930435
13	76	Snuffles	5.5	14	10	10	120	Cob	4	6	Gelding	2		4	0	11	0	11	1	6	0.833333	4	0	4	0	4	1	0.833333	0.75	0.833333	0.791667	0.93	20	4.65	0.97	18	5.38889	1.9	38	5	0.093	0.097	0.095	0.075	0.095
13	77	Bramble	7	14	19	19	228	New Forest Cross	7	6	Gelding	2		2	2	9	6	15	4	6	0.333333	2	1	6	1	7	2	0.666667	0.555556	0.694444	0.625	1	19	5.26316	1.97	19	10.3684	2.97	38	7.81579	0.1	0.0985	0.099	0.085	0.099
13	78	Mrs Beetie	5	13.3	18	18	216	Native	4	6	Mare	1		1	3	3	5	8	5	6	0.166667	0	0	0	0	0	.	.	0.527778	0.638889	0.583333	1.46	20	7.3	1.01	18	5.61111	2.47	38	6.5	0.0973333	0.0673333	0.0823333	0.065	0.0823333
14	79	Stolly	5.5	14	19	19	228	Cross Bred cob	4	6	Gelding	2		6	0	13	0	13	1	10	0.9	6	0	9	0	9	1	0.9	0.888889	0.805556	0.847222	0.62	19	3.26316	0.75	13	5.76923	1.37	32	4.28125	0.0563636	0.0625	0.0595652	0.05	0.0595652
14	80	Spock	6	12	19	19	228	Welsh Section A	1	6	Gelding	2		3	3	9	5	14	5	10	0.5	3	1	4	1	5	2	0.8	1	1	1	0.48	18	2.66667	0.8	15	5.33333	1.28	33	3.87879	0.08	0.0666667	0.0711111	0.06	0.0711111
14	81	Alpha	6.5	11.3	19	19	228	Shetland Cross	1	6	Gelding	2		6	0	13	0	13	1	10	0.9	2	1	2	4	6	3	0.7	0.888889	0.944444	0.916667	0.54	20	2.7	0.48	15	3.2	1.02	35	2.91429	0.06	0.0685714	0.06375	0.065	0.06375
14	82	Strawberry	7.5	12	10	10	120	Cross Bred	1	6	Mare	1		0	5	0	9	9	10	10	0	0	4	0	6	6	9	0.1	0.972222	0.972222	0.972222	0.85	18	4.72222	0.88	14	6.28571	1.73	32	5.40625	0.0772727	0.11	0.0910526	0.06	0.0910526
14	83	Peaches	7	11	18	18	216	Welsh Section A	1	6	Mare	1		3	5	9	9	18	6	10	0.4	1	3	1	3	4	7	0.3	0.944444	1	0.972222	1.79	19	9.42105	0.95	14	6.78571	2.74	33	8.30303	0.179	0.11875	0.152222	0.105	0.152222
14	84	Cracker	6.5	12	17	17	204	Welsh Section A	1	6	Mare	1		2	5	7	16	23	7	10	0.3	3	4	3	4	7	5	0.5	0.944444	1	0.972222	1.46	17	8.58824	0.97	15	6.46667	2.43	32	7.59375	0.104286	0.0692857	0.0867857	0.085	0.0867857
14	85	Erin	8.5	11.2	9	9	108	Native Cross	1	6	Mare	1		5	3	9	8	17	4	10	0.6	2	1	3	1	4	3	0.7	0.944444	0.888889	0.916667	0.85	15	5.66667	0.23	11	2.09091	1.08	26	4.15385	0.0944444	0.0575	0.0830769	0.06	0.0830769
14	86	Smudge	8	11	12	12	144	Native Cross	1	6	Gelding	2		0	5	0	9	9	9	10	0.1	1	5	2	7	9	9	0.1	0.972222	0.972222	0.972222	1.05	19	5.52632	0.15	15	1	1.2	34	3.52941	0.116667	0.0375	0.0923077	0.07	0.0923077
14	87	Swift	6.5	10.3	20	20	240	Native Cross	1	6	Gelding	2		5	1	5	2	7	3	10	0.7	3	1	4	1	5	2	0.8	1	1	1	0.9	19	4.73684	1	13	7.69231	1.9	32	5.9375	0.06	0.0909091	0.0730769	0.045	0.0730769
14	88	Maisy	6	10.2	15	15	180	Native	1	6	Mare	1		1	4	1	8	9	8	10	0.2	2	3	3	4	7	5	0.5	0.888889	0.972222	0.930556	0.92	17	5.41176	1	15	6.66667	1.92	32	6	0.0766667	0.0909091	0.0834783	0.06	0.0834783
15	89	Nesbitt	5.5	17.2	11	11	132	Irish Sport Horse	5	6	Gelding	2		0	2	0	10	10	3	3	0	0	2	0	3	3	3	0	0.888889	0.5	0.694444	1.98	37	5.35135	1.33	34	3.91176	3.31	71	4.66197	0.06	0.0665	0.0624528	0.05	0.0624528
15	90	Jay	7	16	11	11	132	Shire Cross	3	6	Gelding	2		1	1	5	5	10	2	3	0.333333	1	1	2	1	3	2	0.333333	0.861111	0.527778	0.694444	0.71	39	1.82051	1.06	26	4.07692	1.77	65	2.72308	0.0546154	0.0883333	0.0708	0.06	0.0708
15	91	Major	5	17.3	5	5	60	Shire X Percheron	3	6	Gelding	2		2	0	10	0	10	1	3	0.666667	2	0	2	0	2	1	0.666667	1	0.611111	0.805556	2.88	38	7.57895	2.69	35	7.68571	5.57	73	7.63014	0.0669767	0.06725	0.0671084	0.06	0.0671084
16	92	Domino 1	7.5	15	22	22	264	Cob	4	6	Gelding	2		3	0	13	0	13	1	5	0.8	2	0	2	0	2	1	0.8	0.944444	0.777778	0.861111	0.56	25	2.24	1.33	25	5.32	1.89	50	3.78	0.028	0.03325	0.0315	0.03	0.0315
16	93	Oliver	5.5	15	21	21	252	Cob	4	6	Gelding	2		3	1	23	6	29	2	5	0.6	1	1	1	1	2	2	0.6	1	0.944444	0.972222	0.9	25	3.6	1.23	25	4.92	2.13	50	4.26	0.06	0.0647368	0.0626471	0.05	0.0626471
16	94	Comet	5	12	11	11	132	Welsh	1	6	Gelding	2		0	3	0	10	10	5	5	0	0	1	0	1	1	4	0.2	1	1	1	1.41	24	5.875	2.29	24	9.54167	3.7	48	7.70833	0.0542308	0.0693939	0.0627119	0.04	0.0627119
16	95	Jenson	5	11	14	14	168	Crossbred native	1	6	Gelding	2		0	2	0	9	9	4	5	0.2	0	1	0	1	1	4	0.2	1	0.972222	0.986111	0.85	25	3.4	0.21	24	0.875	1.06	49	2.16327	0.053125	0.035	0.0481818	0.04	0.0481818
16	96	Smurf	7	12.2	16	16	192	Welsh Section C	1	6	Gelding	2		2	2	5	14	19	3	5	0.4	1	1	1	1	2	2	0.6	1	1	1	1.37	23	5.95652	1.11	25	4.44	2.48	48	5.16667	0.0441935	0.0382759	0.0413333	0.035	0.0413333
17	97	Ken	7	13	12	12	144	Cob x native pony	1	7	Gelding	2		5	0	18	0	18	1	7	0.857143	1	0	1	0	1	1	0.857143	0.777778	0.972222	0.875	0.73	16	4.5625	1.13	20	5.65	1.86	36	5.16667	0.0608333	0.0627778	0.062	0.04	0.062
17	98	Tressie Do	5.5	12	16	16	192	Native Cross	1	7	Mare	1		1	4	5	14	19	6	7	0.142857	1	1	1	1	2	4	0.428571	0.611111	0.972222	0.791667	1.37	20	6.85	2.36	20	11.8	3.73	40	9.325	0.124545	0.0786667	0.0909756	0.07	0.0909756
17	99	Zoe	5.5	12	13	13	156	Welsh Cross	1	7	Mare	1		1	5	5	15	20	7	7	0	0	2	0	2	2	7	0	0.612903	0.969697	0.796875	1.71	20	8.55	1.76	20	8.8	3.47	40	8.675	0.0551613	0.0606897	0.0578333	0.04	0.0578333
17	100	April B	5	14	16	16	192	Arab Cross	2	7	Mare	1		2	3	9	9	18	4	7	0.428571	1	2	1	2	3	6	0.142857	0.527778	0.972222	0.75	0.56	20	2.8	0.43	17	2.52941	0.99	37	2.67568	0.056	0.0477778	0.0521053	0.04	0.0521053
17	101	Cherry	5	12.1	18	18	216	New Forest	1	7	Mare	1		4	2	11	5	16	3	7	0.571429	1	0	1	0	1	1	0.857143	0.527778	0.888889	0.708333	1.33	16	8.3125	0.95	19	5	2.28	35	6.51429	0.102308	0.05	0.07125	0.05	0.07125
17	102	Dylan	6.5	12	16	16	192	Welsh	1	7	Gelding	2		4	1	11	2	13	2	7	0.714286	1	0	1	0	1	1	0.857143	0.472222	0.888889	0.680556	1.35	18	7.5	0.3	17	1.76471	1.65	35	4.71429	0.0710526	0.0428571	0.0634615	0.06	0.0634615
17	103	Fulmer	6.5	12	12	12	144	Welsh Cross	1	7	Mare	1		2	4	5	19	24	5	7	0.285714	1	1	1	1	2	4	0.428571	0.666667	0.861111	0.763889	0.27	19	1.42105	0.93	19	4.89474	1.2	38	3.15789	0.03375	0.0489474	0.0444444	0.03	0.0444444
18	104	Soldier A	6.5	15.3	5	5	60	Gelderlander	5	5	Gelding	2		0	4	0	10	10	5	5	0	0	3	0	3	3	5	0	0.931034	0.472222	0.676923	0.43	25	1.72	1.38	23	6	1.81	48	3.77083	0.05375	0.0627273	0.0603333	0.04	0.0603333
18	105	Malek	6	15	20	20	240	Irish Draught X	5	1	Gelding	2		1	2	6	4	10	3	5	0.4	2	2	4	2	6	3	0.4	0.722222	0.555556	0.638889	1.61	20	8.05	1.3	23	5.65217	2.91	43	6.76744	0.0555172	0.0619048	0.0582	0.045	0.0582
18	106	Kasmir	5.5	15.2	6	6	72	Warmblood	5	5	Gelding	2		3	1	7	1	8	2	5	0.6	3	1	3	3	6	1	0.8	0.555556	0.5	0.527778	0.75	15	5	0.45	17	2.64706	1.2	32	3.75	0.046875	0.0375	0.0428571	0.04	0.0428571
18	107	Sanek	5.5	15.3	7	7	84	Warmblood	5	5	Gelding	2		1	2	2	7	9	3	5	0.4	1	2	1	4	5	4	0.2	0.555556	0.694444	0.625	1.03	15	6.86667	1.9	23	8.26087	2.93	38	7.71053	0.064375	0.0612903	0.0623404	0.05	0.0623404
18	108	Benedict	5	15.2	6	6	72	Warmblood	5	5	Gelding	2		4	0	7	0	7	1	5	0.8	2	0	4	0	4	1	0.8	0.666667	0.583333	0.625	1.1	15	7.33333	0.76	24	3.16667	1.86	39	4.76923	0.0785714	0.0506667	0.0641379	0.05	0.0641379
19	109	Danny A	5.5	16.3	11	11	132	Shire Cross	3	7	Gelding	2		3	1	10	7	17	2	5	0.6	2	2	3	3	6	3	0.4	0.611111	0.75	0.680556	2.74	23	11.913	3.45	25	13.8	6.19	48	12.8958	0.0805882	0.0958333	0.0884286	0.06	0.0884286
19	110	Molasses	5	17.2	9	9	108	Mule	7	7	Gelding	2		1	3	2	6	8	4	5	0.2	0	3	0	4	4	5	0	0.583333	0.916667	0.75	1.76	21	8.38095	2.9	24	12.0833	4.66	45	10.3556	0.103529	0.120833	0.113659	0.1	0.113659
19	111	J J	5.5	16	15	15	180	Belgium Draft	3	7	Mare	1		4	0	5	1	6	1	5	0.8	1	0	1	0	1	2	0.6	0.583333	.	0.583333	0.52	18	2.88889	.	.	.	0.52	18	2.88889	0.0742857	.	0.0742857	0.05	0.0742857
19	112	Charlie A	6.5	17	15	15	180	Percheron	3	7	Gelding	2		3	1	7	2	9	2	5	0.6	3	0	5	0	5	1	0.8	0.472222	0.861111	0.666667	2.12	23	9.21739	1.5	23	6.52174	3.62	46	7.86957	0.0815385	0.0555556	0.0683019	0.05	0.0683019
19	113	William C	5	17	20	20	240	Percheron	3	7	Gelding	2		0	4	0	8	8	5	5	0	1	2	1	3	4	4	0.2	0.527778	0.833333	0.680556	2.09	23	9.08696	1.53	23	6.65217	3.62	46	7.86957	0.0836	0.0546429	0.0683019	0.05	0.0683019
20	114	Domino 2	4	12.2	19	19	228	Native Cross	1	6	Mare	1		0	2	0	13	13	3	3	0	1	0	1	0	1	1	0.666667	0.805556	0.933333	0.863636	0.56	40	1.4	2.63	40	6.575	3.19	80	3.9875	0.0714815	0.0641463	0.0670588	0.05	0.0670588
20	115	Muffin	4	11	15	15	180	Moorland	1	6	Gelding	2		1	1	10	10	20	2	3	0.333333	0	1	0	1	1	2	0.333333	0.777778	0.966667	0.863636	3.76	38	9.89474	3.48	40	8.7	7.24	78	9.28205	0.0752	0.058	0.0658182	0.05	0.0658182
20	116	Star	6.5	10.3	15	15	180	Welsh Section A	1	6	Gelding	2		2	0	13	0	13	1	3	0.666667	0	0	0	0	0	.	.	1	0.972222	0.986111	0.41	40	1.025	0.42	38	1.10526	0.83	78	1.0641	0.0215789	0.028	0.0244118	0.01	0.0244118
																										* note that where interactions = 0 they usually didn’t get involved in the feeding trial - mention this in methodology paper and give percentages
